# Supplementary material
Source: publisher figshare collection journal article supplement (https://acs.figshare.com/ndownloader/files/4753474)
Supplement: Supplementary file 1 [file 4753474]

## Supporting Information

### **Mechanical Control of Enantioselectivity of Amino Acid Recognition by Cholesterol-Armed Cyclen Monolayer at the Air-Water Interface**

Tsuyoshi Michinobu,<sup>\*,†,§</sup> Satoshi Shinoda,<sup>‡</sup> Takashi Nakanishi,<sup>†</sup> Jonathan  
P. Hill,<sup>†</sup> Kazuko Fujii,<sup>†</sup> Tomoko N. Player,<sup>‡</sup> Hiroshi Tsukube,<sup>\*,‡</sup>  
Katsuhiko Ariga<sup>\*,†</sup>

<sup>†</sup>*National Institute for Materials Science (NIMS), 1-1 Namiki, Tsukuba 305-0044, Japan.*

<sup>‡</sup>*Department of Chemistry, Graduate School of Science, Osaka City University, Sugimoto,  
Sumiyoshi-ku, Osaka 558-8585, Japan.*

<sup>§</sup>*Present address: Tokyo University of Agriculture and Technology, Koganei, Tokyo  
184-8588, Japan.*

## 1. Materials.

Water used for the subphase was distilled using an Autostill WG220 (Yamato) and deionized using a Milli-Q Lab (Millipore). Its specific resistance was greater than 18 M $\Omega$  cm. Spectroscopic grade chloroform (Kanto Chem.) was used as the spreading solvent. Amino acids were purchased from Wako Chemical Co. or Peptide Institute. Synthesis of the cholesterol-armed cyclen NaCl complex **1** was described previously.<sup>1</sup>

## 2. Measurements.

The  $\pi$ -A isotherms were measured at 20.0 °C using an FSD-300 computer-controlled film balance (USI System, Fukuoka). Compression was commenced at a rate of 0.2 mm s<sup>-1</sup> ~10 min after spreading. Fluctuation of the subphase temperature was within  $\pm 0.2$  °C. LB films were prepared using the vertical dipping method with up-stroke and down-stroke motions of 5 mm min<sup>-1</sup> from the pure water and aqueous amino acid subphases. Monolayers were transferred onto gold-deposited glass slides at different surface pressures of 10, 20, and 30 mN m<sup>-1</sup>. Infrared spectra of the LB film on a gold-deposited glass were obtained using an FT-IR spectrometer (Nicolet NEXUS 670FT-IR) equipped with an MCT detector (for RAS, reflection absorption spectroscopy). All data were collected by the RAS method at a spectral resolution of 4 cm<sup>-1</sup>.

### 3. Binding constants

Binding constants ( $K$ ) were determined in the surface pressure range from 1 to 40  $\text{mN m}^{-1}$  using a Langmuir type equation under the assumption that an increase in the molecular area values of the  $\pi$ -A isotherms is proportional to the adsorption amount of amino acids. Surface pressures above 40  $\text{mN m}^{-1}$  were avoided because of the possibility of a monolayer collapse.

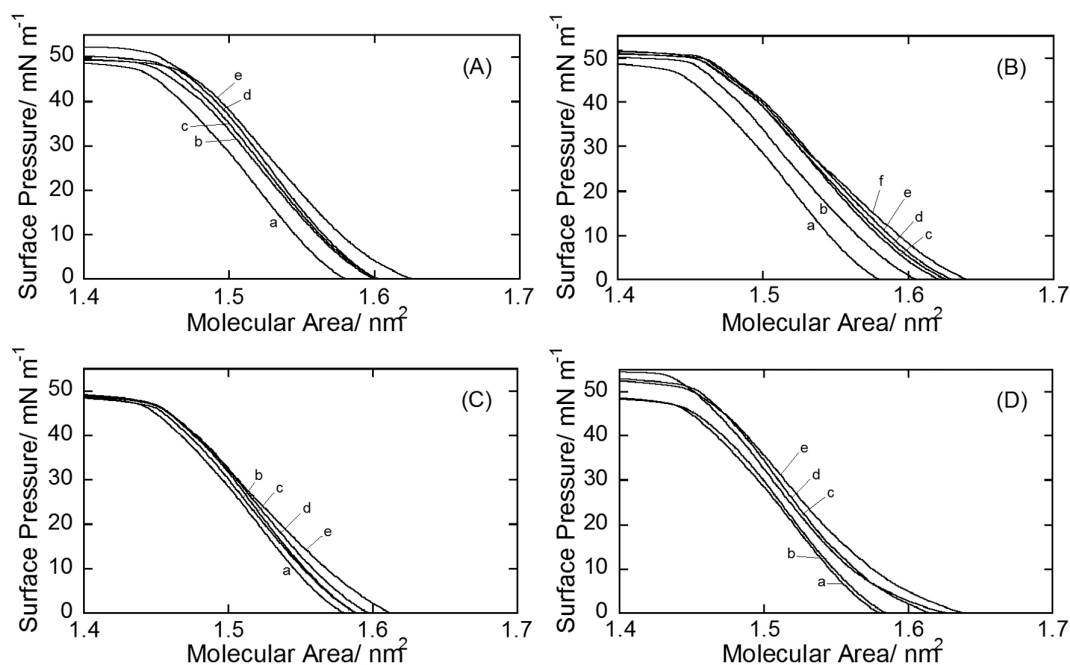

**Figure 1SI.**  $\pi$ -A Isotherms of the cholesterol-armed cyclen NaCl complex monolayer at  $20.0 \pm 0.2$  °C: (A) a, on pure water; b, on 1.5 mM L-leucine; c, on 2 mM L-leucine; d, on 2.5 mM L-leucine; e, on 5 mM L-leucine: (B) a, on pure water; b, on 0.5 mM D-leucine; c, on 1 mM D-leucine; d, on 1.5 mM D-leucine; e, on 2 mM D-leucine; f, on 3 mM D-leucine: (C) a, on pure water; b, on 1 mM L-valine; c, on 1.5 mM L-valine; d, on 3 mM L-valine; e, on 5 mM L-valine: (D) a, on pure water; b, on 1 mM D-valine; c, on 2 mM D-valine; d, on 4 mM D-valine; e, on 10 mM D-valine.

**Table 1SI.** Binding constants ( $K$ ) of enantiomeric leucine and valine to the cholesterol-armed cyclen NaCl complex monolayer.

| Surface<br>Pressure<br>[mN m <sup>-1</sup> ] | $K_{L\text{-Leu}}$ [M <sup>-1</sup> ] | $K_{D\text{-Leu}}$ [M <sup>-1</sup> ] | $K_{D\text{-Leu}}/$<br>$K_{L\text{-Leu}}$ | $K_{L\text{-Val}}$ [M <sup>-1</sup> ] | $K_{D\text{-Val}}$ [M <sup>-1</sup> ] | $K_{D\text{-Val}}/$<br>$K_{L\text{-Val}}$ |
|----------------------------------------------|---------------------------------------|---------------------------------------|-------------------------------------------|---------------------------------------|---------------------------------------|-------------------------------------------|
| 1                                            | 85.2                                  | 1063                                  | 12.47                                     | —                                     | —                                     | —                                         |
| 6                                            | 156.3                                 | 957.4                                 | 6.127                                     | 23.0                                  | 191.9                                 | 8.338                                     |
| 11                                           | 179.3                                 | 934.5                                 | 5.211                                     | 29.6                                  | 144.9                                 | 4.886                                     |
| 16                                           | 214.4                                 | 959.4                                 | 4.475                                     | 76.1                                  | 115.6                                 | 1.518                                     |
| 21                                           | 231.7                                 | 1015                                  | 4.381                                     | 143.6                                 | 164.6                                 | 1.146                                     |
| 26                                           | 301.9                                 | 1190                                  | 3.943                                     | 336.5                                 | 198.3                                 | 0.589                                     |
| 31                                           | 384.7                                 | 1453                                  | 3.776                                     | 712.5                                 | 289.9                                 | 0.407                                     |
| 36                                           | 428.5                                 | 1565                                  | 3.653                                     | 788.0                                 | 364.5                                 | 0.463                                     |
| 40                                           | 425.1                                 | 1729                                  | 4.066                                     | 814.2                                 | 410.1                                 | 0.504                                     |

#### 4. FT-IR-RAS spectra

The peak at 1461-1480  $\text{cm}^{-1}$  (black), derived from the monolayer **1**, was used as a reference peak for peak intensities. In the region of 1300-1800  $\text{cm}^{-1}$ , each peak is distinguished by different colors. The color code is as follows: 1406-1409  $\text{cm}^{-1}$  ( $\nu_{\text{COO}^-}$ ), purple; 1510-1527  $\text{cm}^{-1}$  ( $\delta_{\text{NH}_3^+}$ ), red; 1546-1584  $\text{cm}^{-1}$  ( $\nu_{\text{COO}^-}$ ), brown; 1606-1612  $\text{cm}^{-1}$  ( $\delta_{\text{NH}_3^+}$ ), green; 1731-1741  $\text{cm}^{-1}$  (overlapping  $\nu_{\text{C=O(ester)}}$  and  $\nu_{\text{C=O(carboxylic acid)}}$ ), blue.

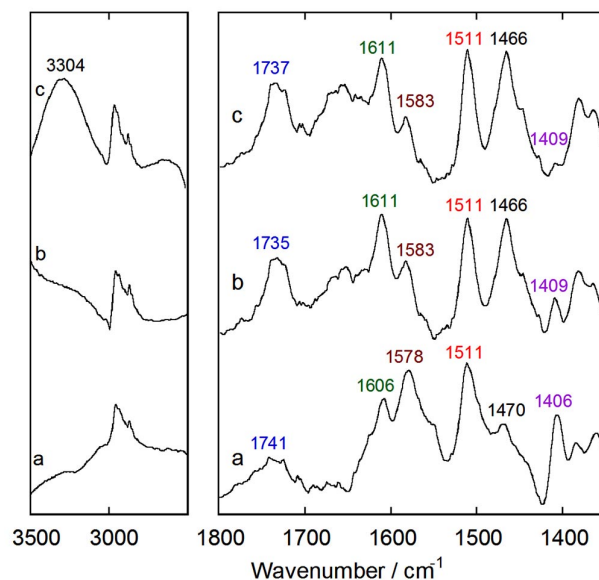

**Figure 2SI.** FT-IR-RAS spectra (1300-1800 and 2500-3500  $\text{cm}^{-1}$ ) of LB films (10 layers) of cholesterol-armed cyclen NaCl complex **1**: a monolayer transferred from 3 mM aqueous L-leucine at surface pressure of a, 10  $\text{mN m}^{-1}$ ; b, 20  $\text{mN m}^{-1}$ ; c, 30  $\text{mN m}^{-1}$ .

#### References

1. Shinoda, S.; Okazaki, T.; Nishimura, T.; Hori, K.; Tsukube, H. *Chem. Commun.* **2001**, 976-977.
